# Supplementary material for: Pattern of medication selling and self-medication practices: A study from Punjab, Pakistan
Source: PubMed Central journal article supplement (PMC5863987; doi:10.1371/journal.pone.0194240), 2018-03-22
Supplement: pone.0194240.s006.pdf [file pone.0194240.s006.pdf]

## Composition of Joshanada

**Joshanda** is a herbal product that contains:

*Camellia sinensis*,

*Ephedra sinica*,

*Eucalyptus globules*,

*Foeniculum vulgare*,

*Glycyrrhiza glabra*,

*Hyssopus officinalis*,

*Judticia adhatoda* and

*Mentha piperita*

It is manufacture by herbal companies on commercial basis and widely used herbal product in the community of Pakistan.
